# Supplementary material
Source: Springer Nature journal article supplement (https://www.springermedizin.de/resource/supplementary/13048_2013_215_MOESM1_ESM.pdf/9665154)
Supplement: MOESM1 [file 9665154]

High risk of OHSS ( $\geq 15$   
follicles of  $>12\text{mm}$ )

**N=748**

HCG trigger, **N=257**

GnRH Agonist trigger,  
**N=363**

Coasting, **N=2**

Cabergoline, **N=6**

Albumin transfusion on  
day of OPU, **N=2**

IVM rescue, **N=118**
